# Supplementary material for: Narcissistic self-sorting vs. statistic ligand shuffling within a series of phenothiazine-based coordination cages
Source: Royal Society of Chemistry journal article supplement (doi:10.1039/c3dt53243g), 2014-01-01
Supplement: c3dt53243g1.pdf [file c3dt53243g1.pdf]

<Supporting Information>

## **Narcissistic self-sorting vs. statistic ligand shuffling within a series of phenothiazine-based coordination cages**

### **Contents**

|                                                                                                                                                                                                                              |    |
|------------------------------------------------------------------------------------------------------------------------------------------------------------------------------------------------------------------------------|----|
| 1. Crystal Structure Analysis .....                                                                                                                                                                                          | 2  |
| 2. <sup>1</sup> H NMR and ESI-MS spectra of the mixing experiments .....                                                                                                                                                     | 5  |
| 2.1.1 Mixture of ligands L <sup>1</sup> and L <sup>2</sup> and cages [Pd <sub>4</sub> L <sup>1</sup> <sub>8</sub> ] and [Pd <sub>4</sub> L <sup>2</sup> <sub>8</sub> ] .....                                                 | 5  |
| 2.1.2 Mixture of ligands L <sup>2</sup> and L <sup>3</sup> and cages [Pd <sub>4</sub> L <sup>2</sup> <sub>8</sub> ] and [Pd <sub>4</sub> L <sup>3</sup> <sub>8</sub> ] .....                                                 | 6  |
| 2.1.3 Mixture of ligands L <sup>2</sup> and L <sup>4</sup> and cages [Pd <sub>4</sub> L <sup>2</sup> <sub>8</sub> ] and [Pd <sub>2</sub> L <sup>4</sup> <sub>4</sub> ] .....                                                 | 7  |
| 2.1.4 Mixture of ligands L <sup>3</sup> and L <sup>4</sup> and cages [Pd <sub>4</sub> L <sup>3</sup> <sub>8</sub> ] and [Pd <sub>2</sub> L <sup>4</sup> <sub>4</sub> ] .....                                                 | 8  |
| 2.1.5 Mixture of cages [Pd <sub>4</sub> L <sup>1</sup> <sub>8</sub> ] and [Pd <sub>4</sub> L <sup>3</sup> <sub>8</sub> ] and 2-Picoline .....                                                                                | 9  |
| 2.1.6 Temporal evolution of the heated samples of the mixture of ligands L <sup>1</sup> and L <sup>3</sup> and cages [Pd <sub>4</sub> L <sup>1</sup> <sub>8</sub> ] and [Pd <sub>4</sub> L <sup>3</sup> <sub>8</sub> ] ..... | 10 |

## 1. Crystal Structure Analysis

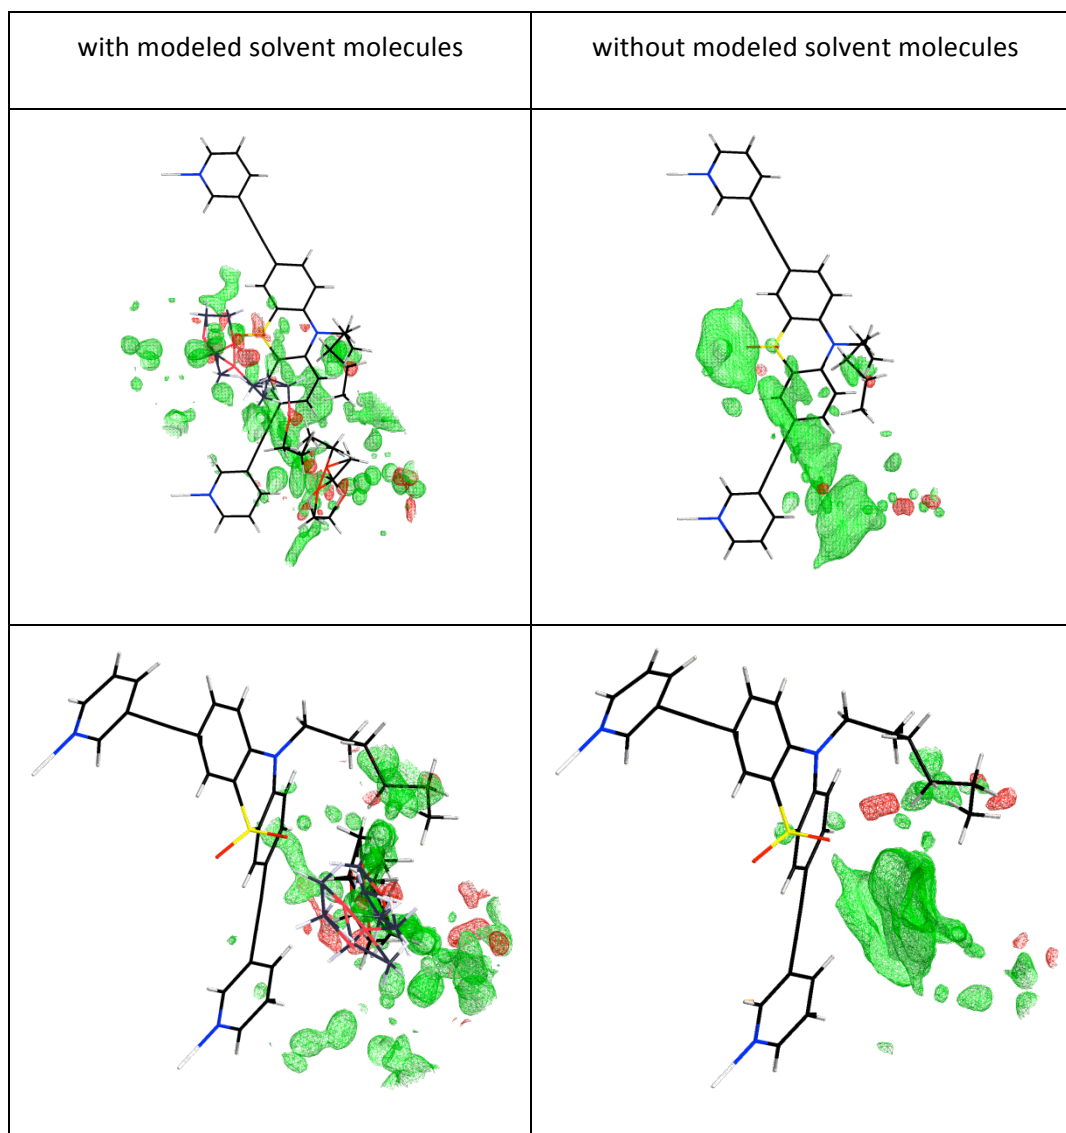

**Fig. SI-1** Exemplification of the solvent accessible crystal voids.

The pictures only show the residual electron density in the solvent channels of one asymmetric unit, the rest of the density and the  $\text{BF}_4^-$  ions are omitted for clarity. Due to the low resolution of the data, it was not possible to adequately model the lattice solvent into these voids and get a stable refinement. In order to extinguish the influence of the electron density present in the voids, the SQUEEZE routine of the PLATON program package was used.<sup>1</sup>

**Table SI-1** Comparison of final model quality indicators.

|              | without solvent | with solvent | squeeze |
|--------------|-----------------|--------------|---------|
| <b>R1</b>    | 0.1158          | 0.0970       | 0.0797  |
| <b>wR2</b>   | 0.3977          | 0.3804       | 0.3011  |
| <b>GooF*</b> | 1.360           | 1.612        | 1.010   |

\*restrained GooF for all data

In conclusion, the utilization of the SQUEEZE routine led to a significant improvement of the model quality of the cage and its counterions. Check-cif data can be found in the reference section.<sup>2</sup>

### Comparison of Crystal Packing of $[\text{Pd}_4\text{L}^1_8]$ , $[\text{Pd}_4\text{L}^2_8]$ and $[\text{Pd}_4\text{L}^3_8]$

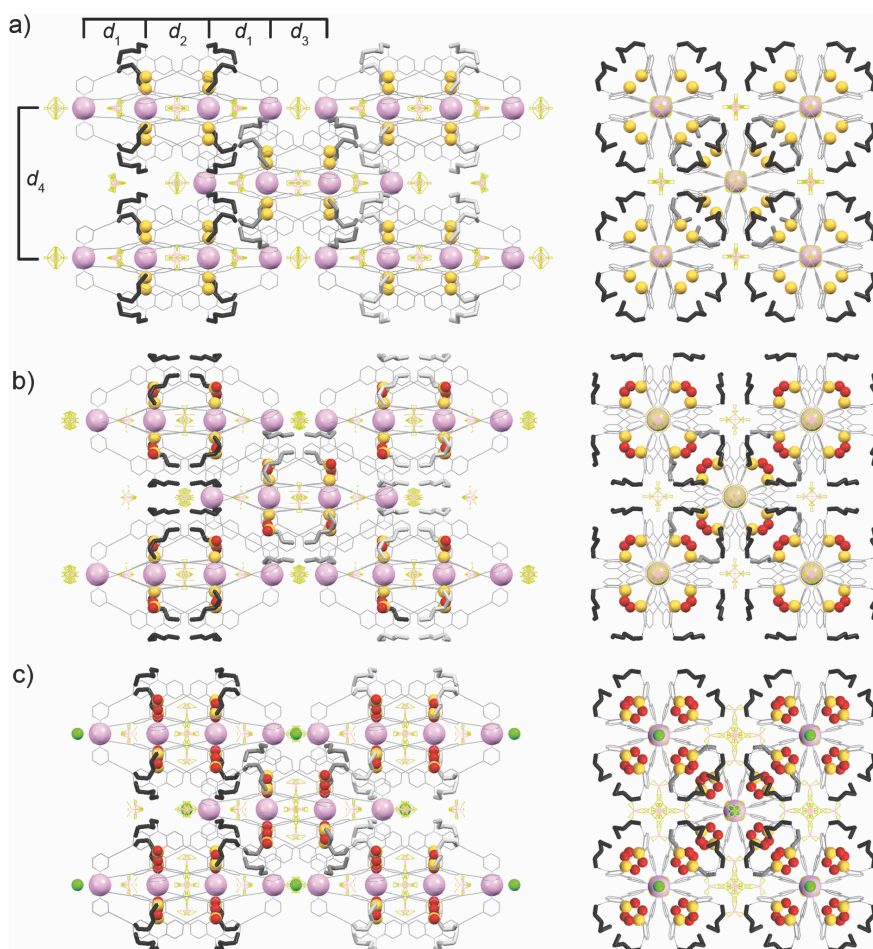

**Fig. SI-2** Side view (left) and view along (right) the  $\text{Pd}_n$ -axis of nine selected cages extracted from the X-ray crystal packing of (a)  $[\text{Pd}_4\text{L}^1_8]$ , (b)  $[\text{Pd}_4\text{L}^2_8]$  and (c)  $[\text{Pd}_4\text{L}^3_8]$  (only anions positioned on the  $\text{Pd}_n$ -axis are shown, other anions and solvent molecules were omitted for clarity. C: grey, N: blue, O: red, S: yellow, B: brown, F: light green, Cl: dark green, Pd: purple). The hexyl residues are highlighted in the colours black, grey and silver to indicate different planes in the packing.

**Table SI-2** Parameters of the cage structures and packing extracted from the crystal structures.

|                                                   | [Pd <sub>4</sub> L <sup>1</sup> <sub>8</sub> ] | [Pd <sub>4</sub> L <sup>2</sup> <sub>8</sub> ] | [Pd <sub>4</sub> L <sup>3</sup> <sub>8</sub> ] |
|---------------------------------------------------|------------------------------------------------|------------------------------------------------|------------------------------------------------|
| $d_1$ (Pd <sub>outer</sub> -Pd <sub>inner</sub> ) | 8.77 Å                                         | 8.16 Å                                         | 8.40 Å                                         |
| $d_2$ (Pd <sub>inner</sub> -Pd <sub>inner</sub> ) | 8.85 Å                                         | 8.63 Å                                         | 8.47 Å                                         |
| $d_3$ (Pd <sub>outer</sub> -Pd <sub>outer</sub> ) | 7.88 Å                                         | 7.77 Å                                         | 6.54 Å                                         |
| $d_4$ (Pd <sub>Cage</sub> -Pd <sub>Cage</sub> )   | 21.12 Å                                        | 21.96 Å                                        | 21.99 Å                                        |

The Pd-Pd distances for a BF<sub>4</sub><sup>-</sup> enclosed between two Pd(pyridine)<sub>4</sub> planes is at least 7.77 Å. The minimum Pd-Pd distance for a Cl<sup>-</sup> is considerably smaller. It was found to be 6.54 Å for the Pd<sub>outer</sub>-Pd<sub>outer</sub> distance in the [Pd<sub>4</sub>L<sup>3</sup><sub>8</sub>] double-cage (for comparison: the distance between two inner Palladium cations enclosing a chloride anion of a previously reported double-cage based on the suberone backbone was found to be 6.26 Å).<sup>3</sup>

## 2. $^1\text{H}$ NMR and ESI-MS spectra of the mixing experiments

### 2.1.1 Mixture of ligands $\text{L}^1$ and $\text{L}^2$ and cages $[\text{Pd}_4\text{L}^1_8]$ and $[\text{Pd}_4\text{L}^2_8]$

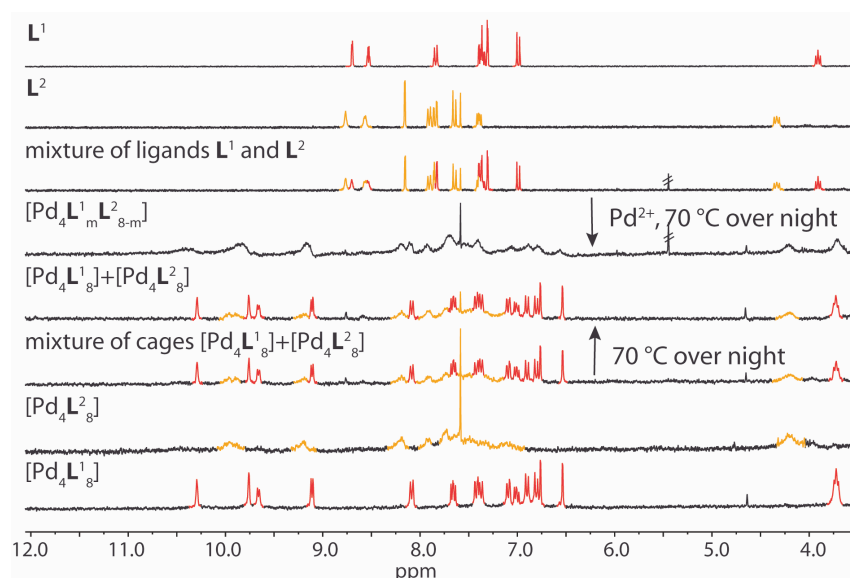

**Fig. SI-3**  $^1\text{H}$  NMR spectra (300 MHz, 298 K,  $\text{CD}_3\text{CN}$ ) of a binary system containing two different long ligands  $\text{L}^1$  +  $\text{L}^2$  (250  $\mu\text{L}$  of a 2.8 mM solution for each ligand). The outcome of the self-assembly gives mixed cages  $[\text{Pd}_4\text{L}^1_m\text{L}^2_{8-m}]$ , showing a statistical ligand distribution when the ligands are mixed prior to the addition of palladium and heating at 70  $^\circ\text{C}$  over night. In contrast, combining two preassembled double-cages  $[\text{Pd}_4\text{L}^1_8]$  +  $[\text{Pd}_4\text{L}^2_8]$  (250  $\mu\text{L}$  of a 0.35 mM solution for each cage) leads to a mixture of coexisting homogeneous structures between which ligand exchange is tremendously slowed down.

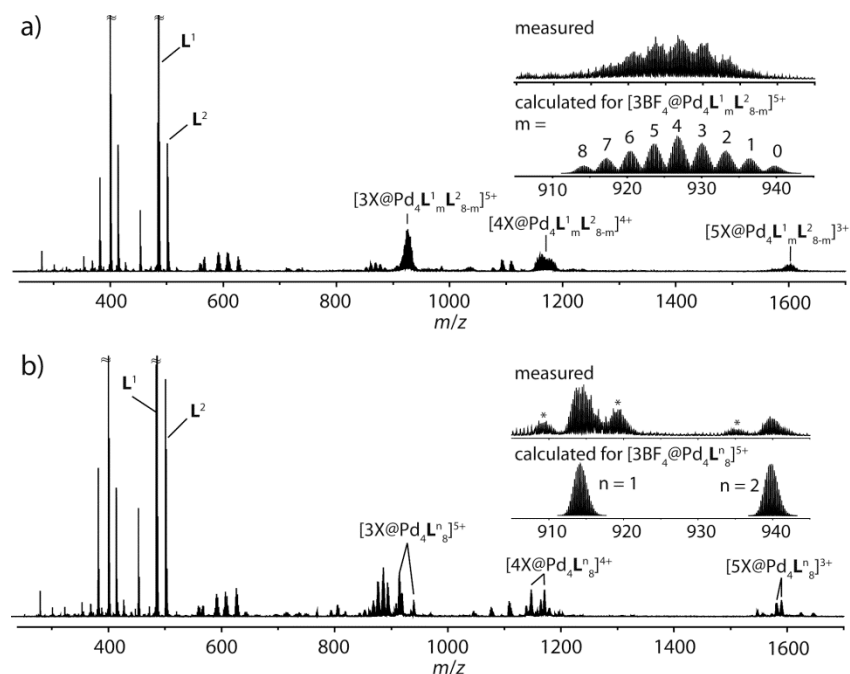

**Fig. SI-4** (a) ESI-TOF mass spectra in positive mode of the solution after addition of 0.5 eq  $\text{Pd}(\text{CH}_3\text{CN})_4(\text{BF}_4)_2$  to premixed ligands  $\text{L}^1$  and  $\text{L}^2$  (250  $\mu\text{L}$  of a 2.8 mM solution for each ligand) and heating in  $\text{CD}_3\text{CN}$  at 70  $^\circ\text{C}$ . The spectra shows a statistical distribution of the ligands forming the double-cages  $[\text{Pd}_4\text{L}^1_m\text{L}^2_{8-m}]$  with  $m = 8-0$ . (b) ESI-TOF mass spectra in positive mode of the solution after mixing the double cages  $[\text{Pd}_4\text{L}^1_8]$  and  $[\text{Pd}_4\text{L}^2_8]$  (250  $\mu\text{L}$  of a 0.35 mM solution for each cage) and heating at 70  $^\circ\text{C}$ . \* denotes other anion combinations with  $\text{X} = \text{BF}_4^-$ ,  $\text{F}^-$ ,  $\text{NO}_3^-$  and  $\text{Cl}^-$ .

## 2.1.2 Mixture of ligands $L^2$ and $L^3$ and cages $[Pd_4L^2_8]$ and $[Pd_4L^3_8]$

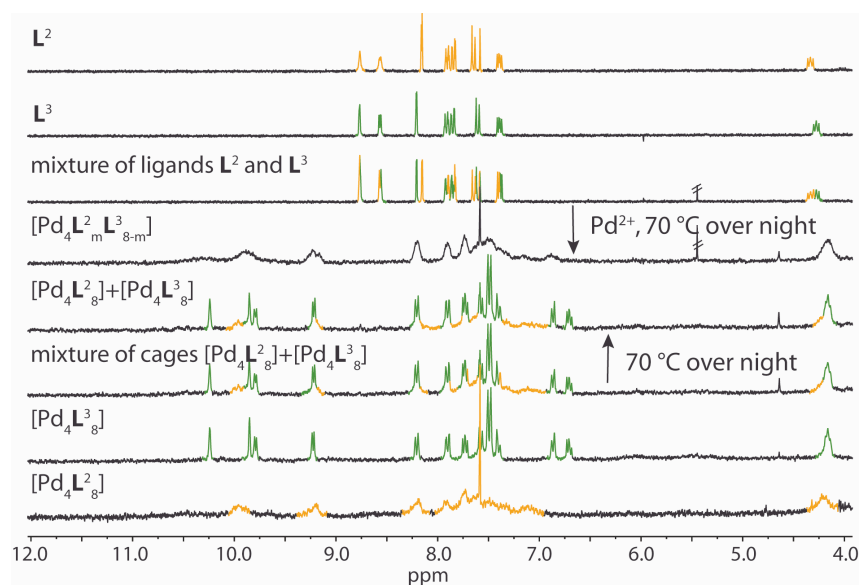

**Fig. SI-5**  $^1H$  NMR spectra (300 MHz, 298 K,  $CD_3CN$ ) of a binary system containing two different long ligands  $L^2 + L^3$  (250  $\mu L$  of a 2.8 mM solution for each ligand). The outcome of the self-assembly gives mixed cages  $[Pd_4L^2_mL^3_{8-m}]$ , showing a statistical ligand distribution when the ligands are mixed prior to the addition of palladium and heating at 70  $^\circ C$  over night. In contrast, combining two preassembled double-cages  $[Pd_4L^2_8] + [Pd_4L^3_8]$  (250  $\mu L$  of a 0.35 mM solution for each cage) leads to a mixture of coexisting homogeneous structures between which ligand exchange is tremendously slowed down.

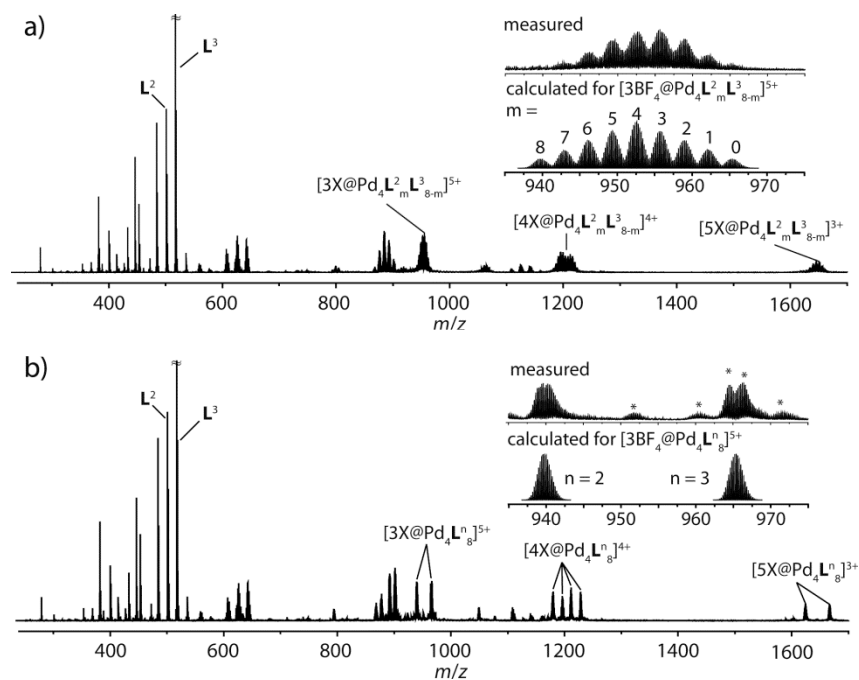

**Fig. SI-6** (a) ESI-TOF mass spectra in positive mode of the solution after addition of 0.5 eq  $Pd(CH_3CN)_4(BF_4)_2$  to premixed ligands  $L^2$  and  $L^3$  (250  $\mu L$  of a 2.8 mM solution for each ligand) and heating in  $CD_3CN$  at 70  $^\circ C$ . The spectra shows a statistical distribution of the ligands forming the double-cages  $[Pd_4L^2_mL^3_{8-m}]$  with  $m = 8-0$ . (b) ESI-TOF mass spectra in positive mode of the solution after mixing the double cages  $[Pd_4L^2_8]$  and  $[Pd_4L^3_8]$  (250  $\mu L$  of a 0.35 mM solution for each cage) and heating at 70  $^\circ C$ . \* denotes other anion combinations with  $X = BF_4^-, F^-, NO_3^-$  and  $Cl^-$ .

### 2.1.3 Mixture of ligands $L^2$ and $L^4$ and cages $[Pd_4L^2_8]$ and $[Pd_2L^4_4]$

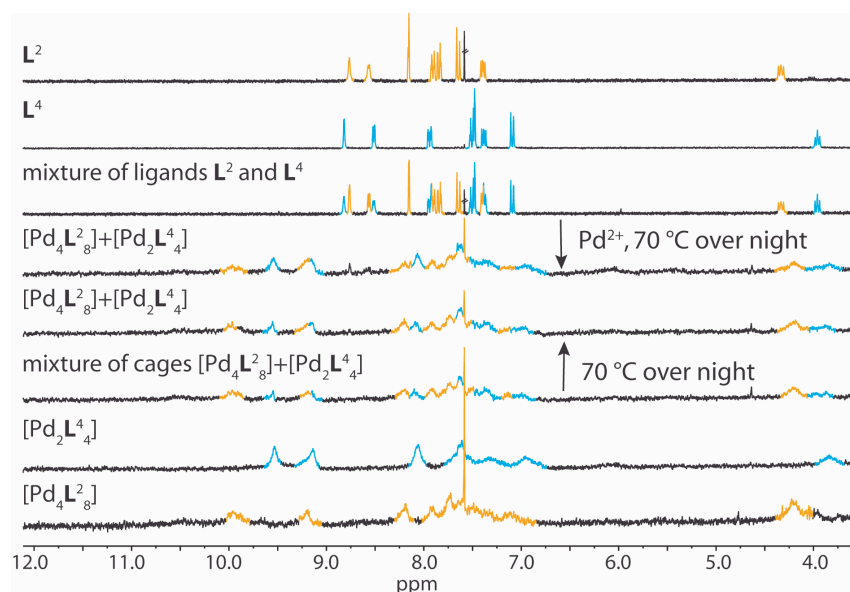

**Fig. SI-7**  $^1H$  NMR spectra (300 MHz, 298 K,  $CD_3CN$ ) of the binary system containing the long ligand  $L^2$  and the short ligand  $L^4$ . The outcome of the self-assembly is independent of the order of mixing of the components. In both cases, this system shows narcissistic self-sorting behaviour to give mixture of cages  $[Pd_4L^2_8]$  and  $[Pd_2L^4_4]$ .

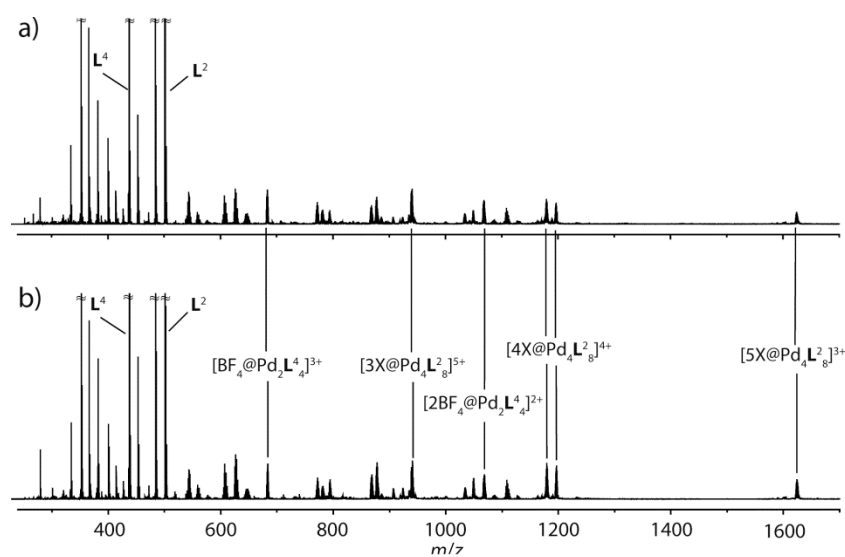

**Fig. SI-8** (a) ESI-TOF mass spectra in positive mode of the solution after addition of 0.5 eq  $Pd(CH_3CN)_4(BF_4)_2$  to premixed ligands  $L^2$  and  $L^4$  (250  $\mu L$  of a 2.8 mM solution for each ligand) and heating in  $CD_3CN$  at 70  $^\circ C$ . (b) ESI-TOF mass spectra in positive mode of the solution of the mixed double cages  $[Pd_4L^2_8]$  and  $[Pd_2L^4_4]$  (250  $\mu L$  of a 0.35 mM solution for each cage) and after heating at 70  $^\circ C$ . The spectra show no exchange of the ligands.  $X = BF_4^-, F^-, NO_3^-$ .

### 2.1.4 Mixture of ligands $L^3$ and $L^4$ and cages $[Pd_4L^3_8]$ and $[Pd_2L^4_4]$

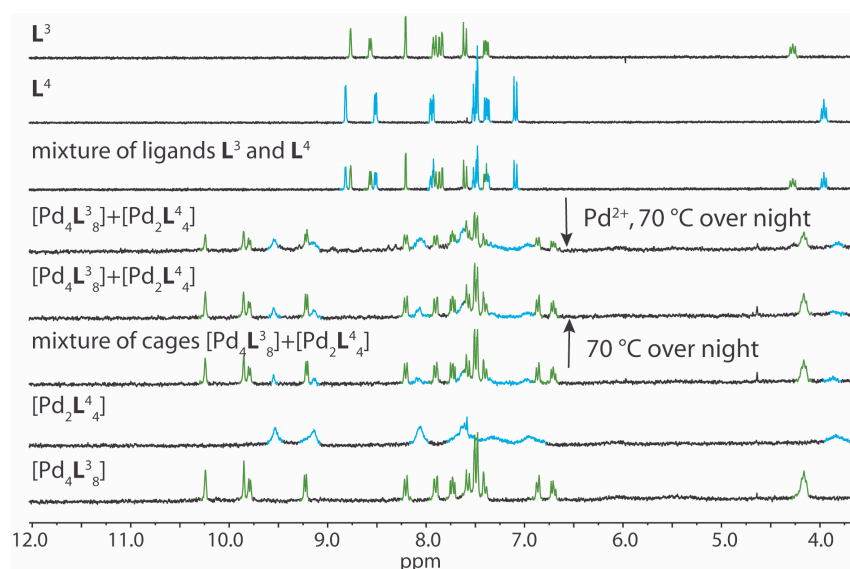

**Fig. SI-9**  $^1H$  NMR spectra (300 MHz, 298 K,  $CD_3CN$ ) of the binary system containing the long ligand  $L^3$  and the short ligand  $L^4$ . The outcome of the self-assembly is independent of the order of mixing of the components. In both cases, this system shows narcissistic self-sorting behaviour to give mixture of cages  $[Pd_4L^3_8]$  and  $[Pd_2L^4_4]$ .

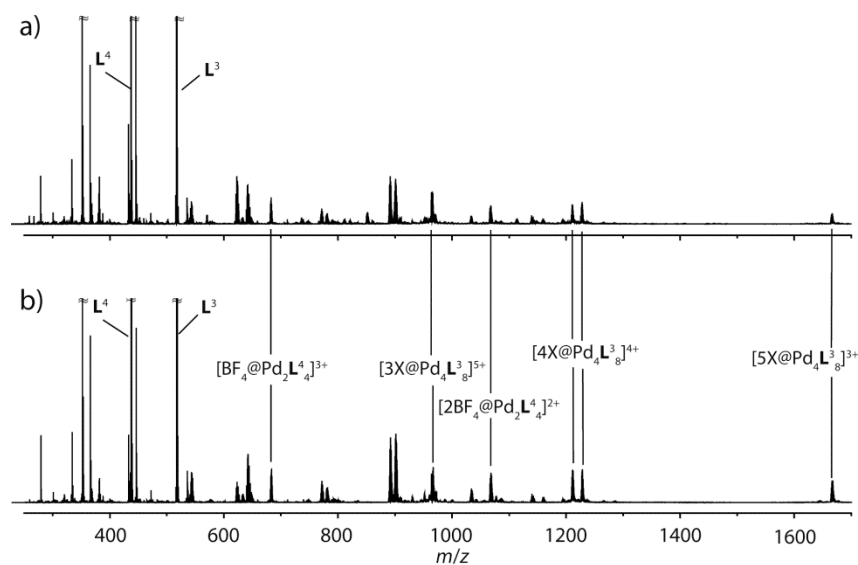

**Fig. SI-10** (a) ESI-TOF mass spectra in positive mode of the solution after addition of 0.5 eq  $Pd(CH_3CN)_4(BF_4)_2$  to premixed ligands  $L^3$  and  $L^4$  (250  $\mu L$  of a 2.8 mM solution for each ligand) and heating in  $CD_3CN$  at 70  $^\circ C$ . (b) ESI-TOF mass spectra in positive mode of the solution of the mixed double cages  $[Pd_4L^3_8]$  and  $[Pd_2L^4_4]$  (250  $\mu L$  of a 0.35 mM solution for each cage) and after heating at 70  $^\circ C$ . The spectra show no exchange of the ligands.  $X = BF_4^-, F^-, NO_3^-$ .



### 2.1.5 Mixture of cages $[\text{Pd}_4\text{L}^1_8]$ and $[\text{Pd}_4\text{L}^3_8]$ and 2-Picoline

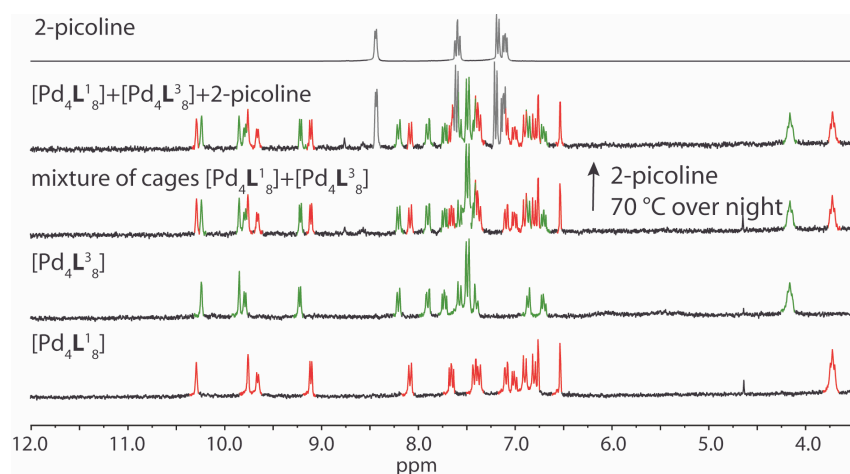

**Fig. SI-11**  $^1\text{H}$  NMR spectra (300 MHz, 298 K,  $\text{CD}_3\text{CN}$ ) of the mixture of cages  $[\text{Pd}_4\text{L}^1_8]$  and  $[\text{Pd}_4\text{L}^3_8]$  (250  $\mu\text{L}$  of a 0.35 mM solution for each cage) and 2-picoline (8 eq per cage molecule, 13  $\mu\text{L}$  of a 101 mM stock solution). The outcome shows no exchange of the ligands even after heating at 70  $^\circ\text{C}$ .

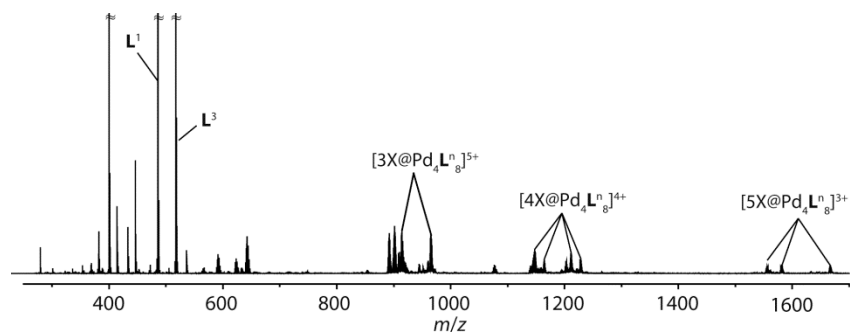

**Fig. SI-12** ESI-TOF mass spectra in positive mode of the solution of the mixed double cages  $[\text{Pd}_4\text{L}^1_8]$  and  $[\text{Pd}_4\text{L}^3_8]$  (250  $\mu\text{L}$  of a 0.35 mM solution for each cage) and 2-picoline after heating at 70  $^\circ\text{C}$ .  $\text{X} = \text{BF}_4^-, \text{F}^-, \text{NO}_3^-$ .

## 2.1.6 Temporal evolution of the heated samples of the mixture of ligands $L^1$ and $L^3$ and cages $[Pd_4L^1_8]$ and $[Pd_4L^3_8]$

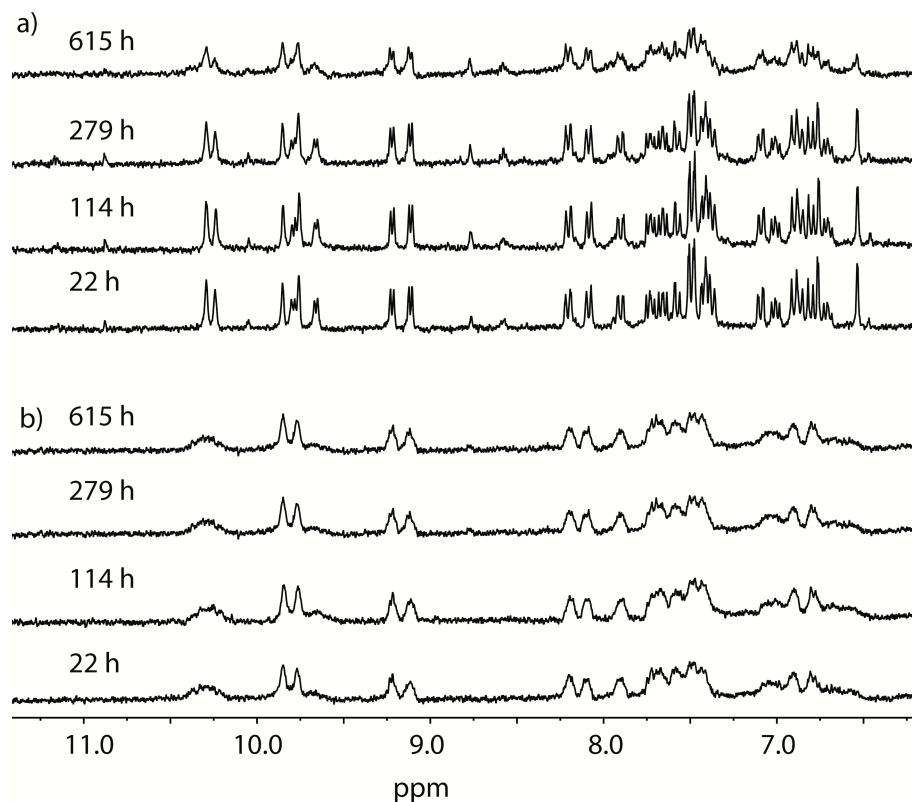

**Fig. SI-13** a)  $^1H$  NMR spectra (300 MHz, 298 K,  $CD_3CN$ ) of a binary system of mixed-ligand cages  $[Pd_4L^1_m L^3_{8-m}]$  ( $m = 1 - 8$ ), containing two different long ligands  $L^1 + L^3$  (250  $\mu L$  of a 2.8 mM solution for each ligand) after heating at 70  $^{\circ}C$  for 22 h, 114 h, 279 h and 615 h. b) In contrast, combining two preassembled double-cages  $[Pd_4L^1_8] + [Pd_4L^3_8]$  (250  $\mu L$  of a 0.35 mM solution for each cage) and heating at 70  $^{\circ}C$  leads to a mixture of coexisting homogeneous structures between which ligand exchange is tremendously slowed down.

<sup>1</sup> a) A. L. Spek, *J. Appl. Cryst.*, 2003, **36**, 7-13; b) P. van der Sluis, A. L. Spek, *Acta Cryst.*, 1990, **A46**, 194-201.

<sup>2</sup> Check-cif data:

|                    |                |              |                    |
|--------------------|----------------|--------------|--------------------|
| Bond precision:    | C-C = 0.0087 Å |              | Wavelength=0.71073 |
| Cell:              | a=21.991 (2)   | b=21.991 (2) | c=31.800 (3)       |
|                    | alpha=90       | beta=90      | gamma=90           |
| Temperature: 100 K |                |              |                    |
|                    | Calculated     | Reported     |                    |
| Volume             | 15379 (3)      | 15379 (3)    |                    |
| Space group        | P 4/n n c      | P 4/n n c    |                    |
| Hall group         | -P 4a 2bc      | -P 4a 2bc    |                    |

---

|                        |                                                                               |                                  |
|------------------------|-------------------------------------------------------------------------------|----------------------------------|
| Moiety formula         | 2 (C128 H108 N12 O8 Pd2 S4),<br>0.13 (B8 F32), 0.73 (B4 F16),<br>0.54 (B2 S2) | C64 H54 B1.75 Cl0.25 F7 N6 O4 Pd |
| Sum formula            | C256 H216 B7 Cl F28 N24 O16 Pd4 S8                                            | S2                               |
| Mr                     | 5209.80                                                                       | 1302.43                          |
| Dx, g cm <sup>-3</sup> | 1.125                                                                         | 1.125                            |
| Z                      | 2                                                                             | 8                                |
| Mu (mm <sup>-1</sup> ) | 0.363                                                                         | 0.363                            |
| F000                   | 5328.0                                                                        | 5328.0                           |
| F000'                  | 5324.85                                                                       |                                  |
| h, k, l <sub>max</sub> | 25, 25, 36                                                                    | 25, 24, 36                       |
| Nref                   | 5936                                                                          | 5937                             |
| Tmin, Tmax             | 0.968, 0.978                                                                  | 0.400, 0.428                     |
| Tmin'                  | 0.968                                                                         |                                  |

Correction method= MULTI-SCAN

Data completeness= 1.000                      Theta(max)= 23.837

R(reflections)= 0.0798 ( 4025)                      wR2(reflections)= 0.3031 ( 5937)

S = 1.060                      Npar= 682

---

The following ALERTS were generated. Each ALERT has the format

**test-name\_ALERT\_alert-type\_alert-level.**

Click on the hyperlinks for more details of the test.

---

### 🟡 Alert level B

Crystal system given = tetragonal

[THETM01\\_ALERT\\_3\\_B](#) The value of sine(theta\_max)/wavelength is less than 0.575

Calculated sin(theta\_max)/wavelength = 0.5686

[PLAT019\\_ALERT\\_1\\_B](#) Check \_diffrn\_measured\_fraction\_theta\_full/\_max 0.850

[PLAT973\\_ALERT\\_2\\_B](#) Large Calcd. Positive Residual Density on Pd2 1.61 eA<sup>-3</sup>

---

### 🟢 Alert level C

[REFNR01\\_ALERT\\_3\\_C](#) Ratio of reflections to parameters is < 10 for a centrosymmetric structure

sine(theta)/lambda 0.5686

Proportion of unique data used 1.0000

Ratio reflections to parameters 8.7053

[RFACR01\\_ALERT\\_3\\_C](#) The value of the weighted R factor is > 0.25

Weighted R factor given 0.303

[PLAT084\\_ALERT\\_3\\_C](#) High wR2 Value (i.e. > 0.25) ..... 0.30

---

|                                   |                                                  |             |
|-----------------------------------|--------------------------------------------------|-------------|
| <a href="#">PLAT088 ALERT 3 C</a> | Poor Data / Parameter Ratio .....                | 8.71        |
| <a href="#">PLAT094 ALERT 2 C</a> | Ratio of Maximum / Minimum Residual Density .... | 2.19        |
| <a href="#">PLAT213 ALERT 2 C</a> | Atom F31 has ADP max/min Ratio .....             | 3.2         |
| prolat                            |                                                  |             |
| <a href="#">PLAT220 ALERT 2 C</a> | Large Non-Solvent C Ueq(max)/Ueq(min) ...        | 3.5 Ratio   |
| <a href="#">PLAT222 ALERT 3 C</a> | Large Non-Solvent H Uiso(max)/Uiso(min) ..       | 4.3 Ratio   |
| <a href="#">PLAT342 ALERT 3 C</a> | Low Bond Precision on C-C Bonds .....            | 0.0087 Ang. |
| <a href="#">PLAT410 ALERT 2 C</a> | Short Intra H...H Contact H19 .. H27E ..         | 1.94 Ang.   |
| <a href="#">PLAT905 ALERT 3 C</a> | Negative K value in the Analysis of Variance ... | -6.187      |
| <a href="#">PLAT918 ALERT 3 C</a> | Reflection(s) # with I(obs) much smaller I(calc) | 7 Check     |
| <a href="#">PLAT973 ALERT 2 C</a> | Large Calcd. Positive Residual Density on Pd1    | 1.48 eA-3   |

---

### ● Alert level G

|                                   |                                                  |                      |
|-----------------------------------|--------------------------------------------------|----------------------|
| <a href="#">PLAT002 ALERT 2 G</a> | Number of Distance or Angle Restraints on AtSite | 75 Note              |
| <a href="#">PLAT003 ALERT 2 G</a> | Number of Uiso or Uij Restrained non-H Atoms ... | 77                   |
| <a href="#">PLAT042 ALERT 1 G</a> | Calc. and Reported MoietyFormula Strings Differ  | Please Check         |
| <a href="#">PLAT045 ALERT 1 G</a> | Calculated and Reported Z Differ by .....        | 0.25 Ratio           |
| <a href="#">PLAT072 ALERT 2 G</a> | SHELXL First Parameter in WGHT Unusually Large.  | 0.19                 |
| <a href="#">PLAT083 ALERT 2 G</a> | SHELXL Second Parameter in WGHT Unusually Large. | 36.09                |
| <a href="#">PLAT301 ALERT 3 G</a> | Main Residue Disorder .....                      | Percentage = 30 Note |
| <a href="#">PLAT371 ALERT 2 G</a> | Long C(sp2)-C(sp1) Bond C4 - C6 ...              | 1.42 Ang.            |

#### And 3 other PLAT371 Alerts

More ...

|                                   |                                                  |           |
|-----------------------------------|--------------------------------------------------|-----------|
| <a href="#">PLAT605 ALERT 4 G</a> | Structure Contains Solvent Accessible VOIDS of . | 325 A**3  |
| <a href="#">PLAT811 ALERT 5 G</a> | No ADDSYM Analysis: Too Many Excluded Atoms .... | ! Info    |
| <a href="#">PLAT860 ALERT 3 G</a> | Number of Least-Squares Restraints .....         | 1149 Note |
| <a href="#">PLAT869 ALERT 4 G</a> | ALERTS Related to the use of SQUEEZE Suppressed  | ! Info    |
| <a href="#">PLAT909 ALERT 3 G</a> | Percentage of Observed Data at Theta(Max) still  | 39 %      |

---

- 0 **ALERT level A** = Most likely a serious problem - resolve or explain  
3 **ALERT level B** = A potentially serious problem, consider carefully  
13 **ALERT level C** = Check. Ensure it is not caused by an omission or oversight  
16 **ALERT level G** = General information/check it is not something unexpected

- 3 ALERT type 1 CIF construction/syntax error, inconsistent or missing data  
14 ALERT type 2 Indicator that the structure model may be wrong or deficient  
12 ALERT type 3 Indicator that the structure quality may be low  
2 ALERT type 4 Improvement, methodology, query or suggestion  
1 ALERT type 5 Informative message, check

<sup>3</sup> Sabrina Freye, Reent Michel, Dietmar Stalke, Martin Pawliczek, Holm Frauendorf, Guido H. Clever, *J. Am. Chem. Soc.*, 2013, **135**, 8476.
